# Supplementary material for: MTAP deficiency creates an exploitable target for antifolate therapy in 9p21-loss cancers
Source: PubMed Central journal article supplement (PMC8980015; doi:10.1038/s41467-022-29397-z), 2022-04-04
Supplement: 41467_2022_29397_MOESM1_ESM.pdf [file 41467_2022_29397_MOESM1_ESM.pdf]

# Inventory of Supporting Information

- Supplementary Figures and Legend
- Supplementary Tables and Legend

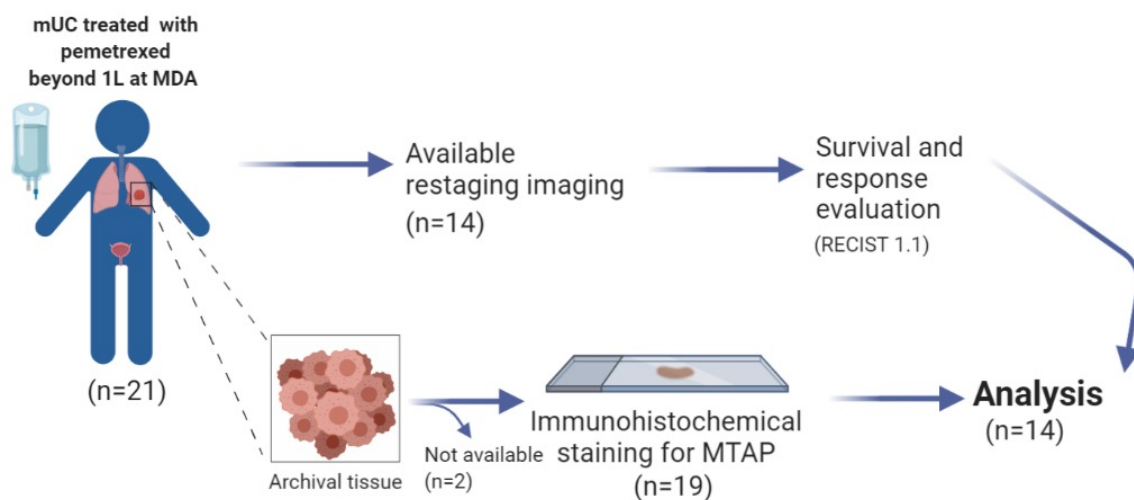

**Supplementary Fig. 1. Schema of retrospective analysis.** MTAP<sup>def</sup>, MTAP deficient; MTAP<sup>prof</sup>, MTAP proficient. Schema to demonstrate the retrospective analysis performed on patients with metastatic urothelial carcinoma and archival tissue available for MTAP immunohistochemical staining to correlate with response to pemetrexed.

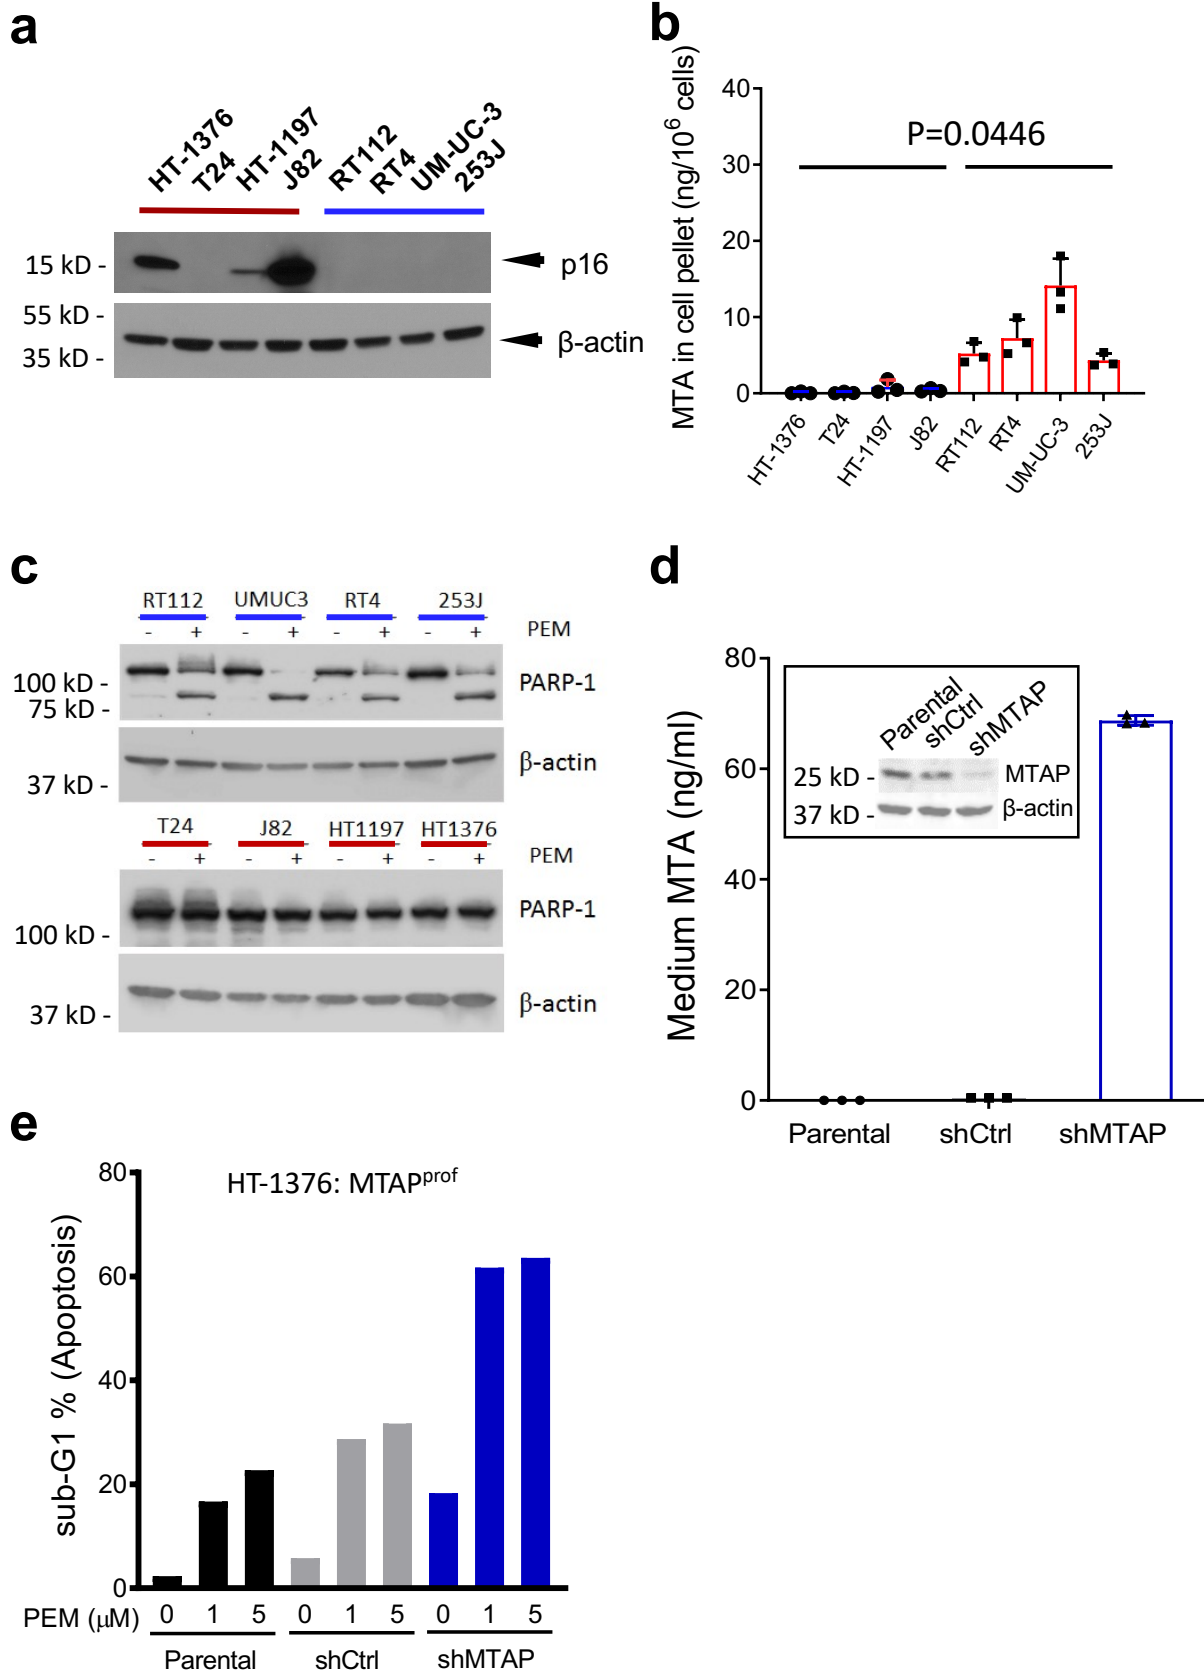

**Supplementary Fig. 2. *In vitro* analysis of functional loss of MTAP and apoptotic response to pemetrexed assessment.** MTAP<sup>def</sup>, MTAP deficient; MTAP<sup>prof</sup>, MTAP proficient. **(a)** p16 protein levels in eight human bladder carcinoma cell lines. **(b)** Cell culture pellet MTA level between MTAP<sup>def</sup> and MTAP<sup>prof</sup> cell lines. P value was calculated by Welch's T test. **(c)** Pemetrexed treatment can induce significant PARP1 cleavage in MTAP<sup>def</sup> cell lines but not in MTAP<sup>prof</sup> cell lines. **(d)** MTA levels increased after MTAP knockdown with shRNAs in HT1376 cell line. In both (b) and (d), n=3 biologically independent samples for each cell line were used. Data in b and d (bottom panel) are presented as mean +/- SD. **(e)** MTAP knockdown in HT1376 cell line increased sensitivity to pemetrexed treatment.

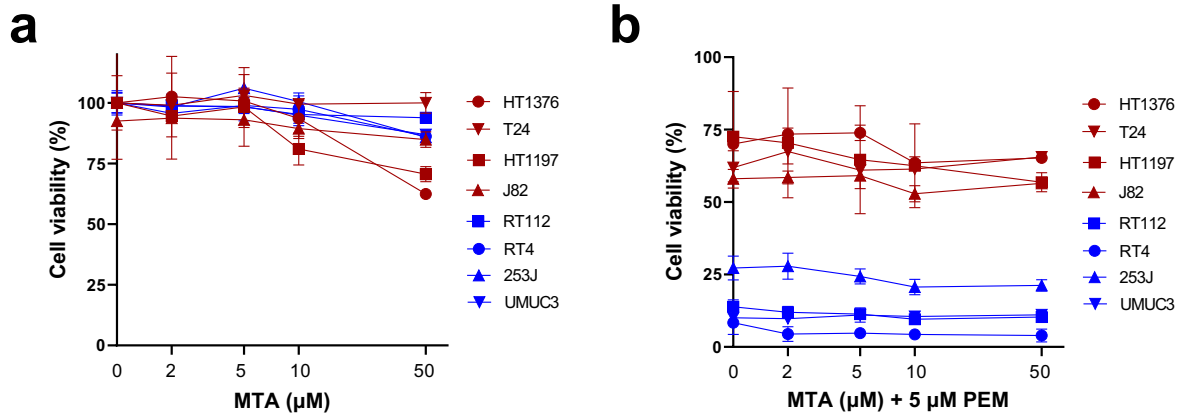

**Supplementary Fig. 3. Effect of MTA alone or combined with pemetrexed on cell viability among UC cell lines. (a)** both  $\text{MTAP}^{\text{prof}}$  (red) and  $\text{MTAP}^{\text{def}}$  (blue) UC cell lines are resistant to MTA therapy. **(b)** the increased sensitivity of  $\text{MTAP}^{\text{def}}$  (blue) as compared to  $\text{MTAP}^{\text{prof}}$  (red) UC cell lines upon exposure to pemetrexed (5  $\mu\text{l}$ ) is not altered with increasing doses of MTA.  $n=3$  biologically independent samples for each cell line. Data are presented as mean  $\pm$  SD.



**a**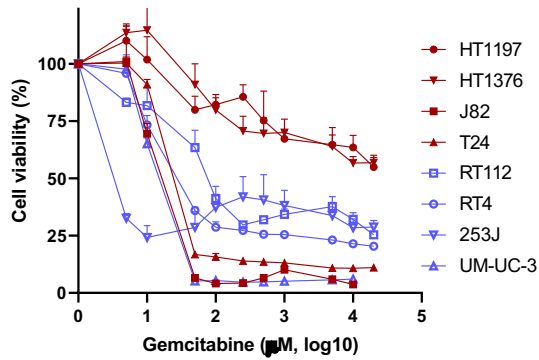**b**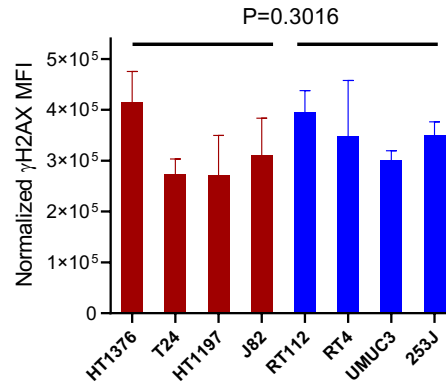**c**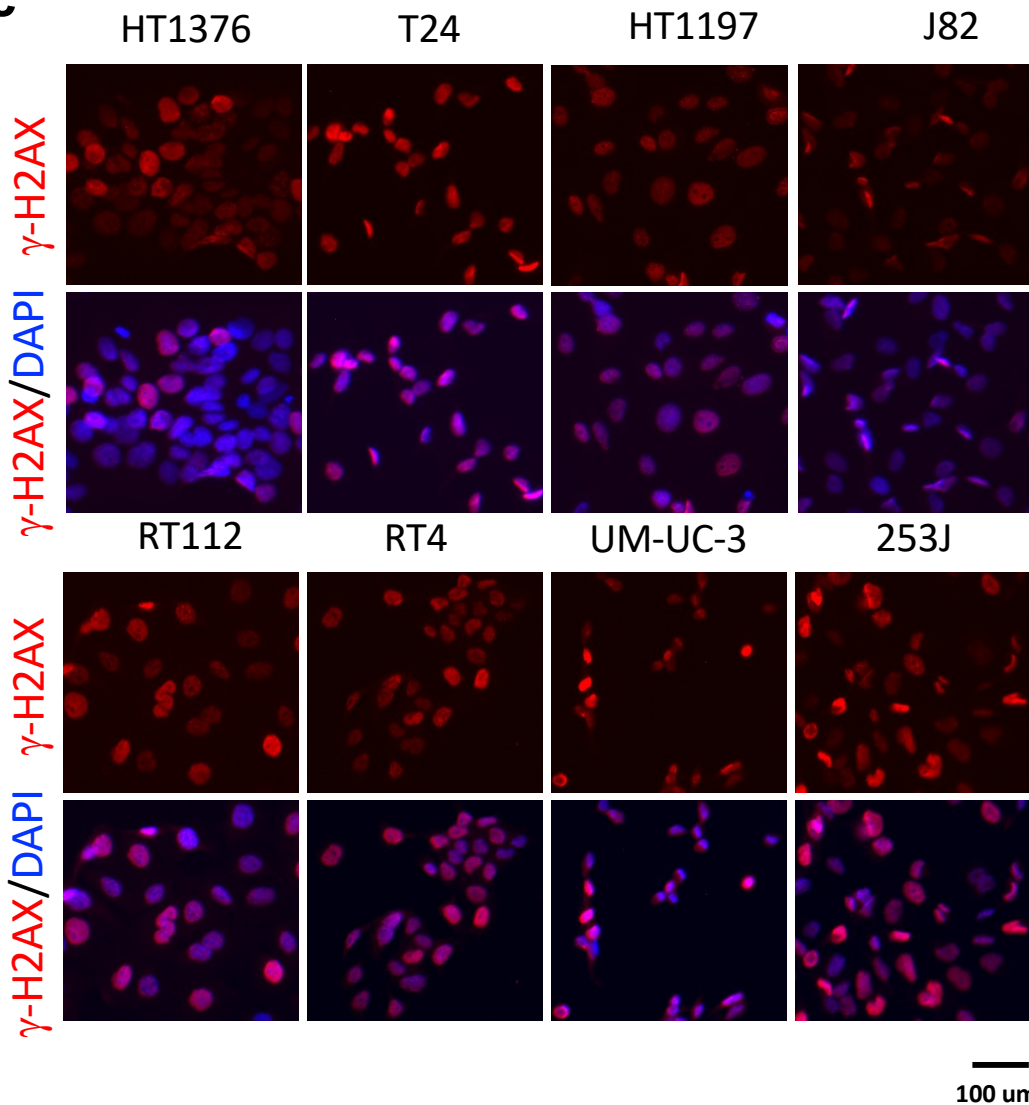

**Supplementary Fig. 4. Gemcitabine induces undifferentiated cytotoxicity and DNA damage regardless of MTAP status in vitro.**

**(a)** Gemcitabine treatment for 72h lead to cell growth inhibition in both MTAP<sup>def</sup> and MTAP<sup>prof</sup> bladder cancer cell lines in vitro. n=4 biologically independent samples for each cell line **(b)** g-H2AX staining showed similar effects on DNA damage were induced in both MTAP<sup>def</sup> and MTAP<sup>prof</sup> cells treated with 1 μM gemcitabine for 24h. n=5 biologically independent samples for each cell. Data are presented as mean +/- SEM. P value was calculated using Welch T test. **(c)** Representative images for g-H2AX (red) and DAPI (blue) immunofluorescence staining in eight bladder cancer cell lines.

**a**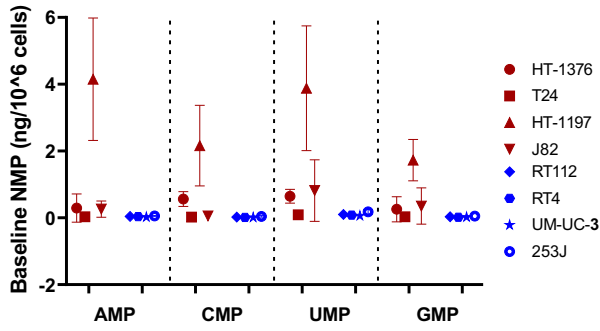**b**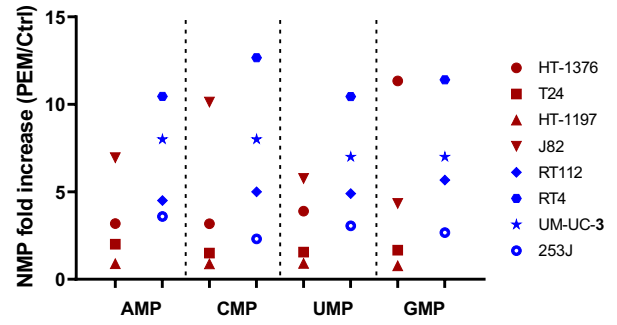

**Supplementary Fig. 5. Distorted nucleotide monophosphate (NMP) pools *in vitro* upon therapy with pemetrexed. (a)** baseline NMP concentration in MTAP<sup>prof</sup> (red) and MTAP<sup>def</sup> (blue) UC cell lines. Each cell line was retested 3 times. The symbol represents the mean along with SD bars. No significant difference was observed between the MTAP<sup>prof</sup> and MTAP<sup>def</sup> cell lines. N=3 biologically independent samples for each cell **(b)** Fold increase in NMPs upon treatment with pemetrexed (5  $\mu$ m). Statistical testing was done using Welch T test. No significant difference was observed between the MTAP<sup>prof</sup> and MTAP<sup>def</sup> cell lines.

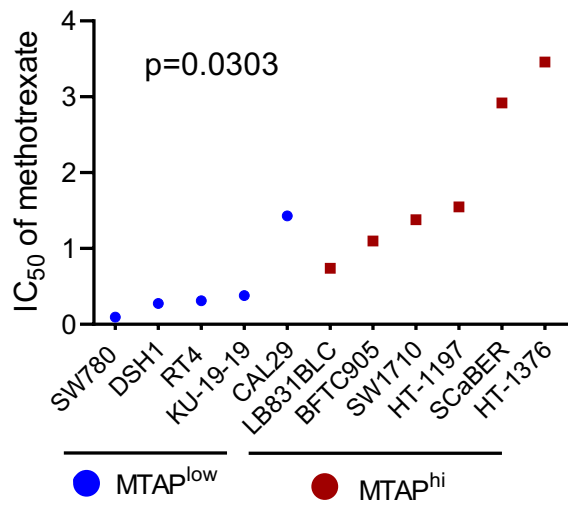

**Supplementary Fig. 6. Analysis of the Genomics of Drug Sensitivity in Cancer (GDSC) dataset.** MTAP<sup>def</sup>, MTAP deficient; MTAP<sup>prof</sup>, MTAP proficient; IC<sub>50</sub>, drug concentration that reduces viability by 50%. **(a)** GDSC analysis shows lower methotrexate IC<sub>50</sub> for MTAP<sup>def</sup> compared MTAP<sup>prof</sup> UC cell lines. Statistical comparison was done using Mann-Whitney test.

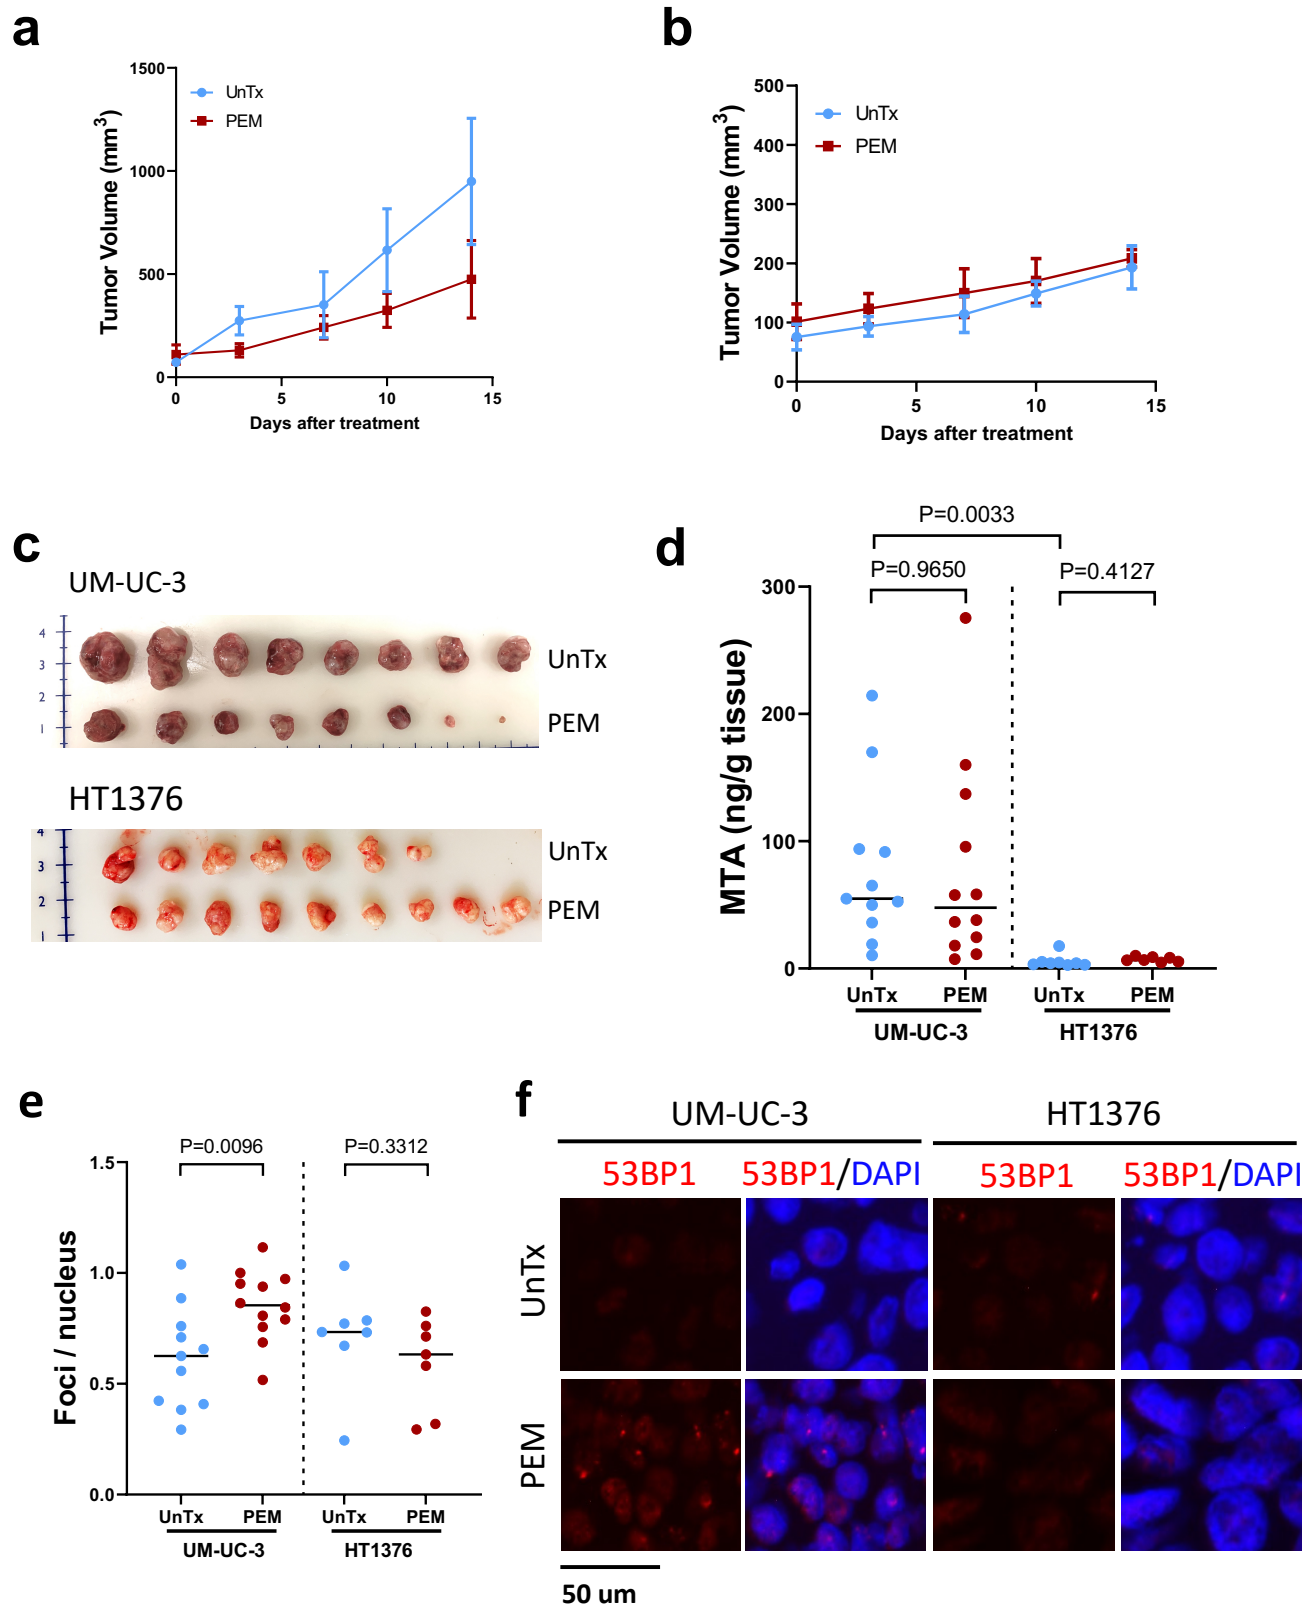

**Supplementary Fig. 7. Effect of pemetrexed on  $MTA^{def}$  tumor suppression is linked to DNA damage in xenograft mouse model. (a) and (b),** Tumor growth curves of pemetrexed (PEM) treated mice bearing UM-UC-3 (a) and HT1376 (b) tumors until two weeks after treatment. UC3 untreated (UnTx)  $n=11$ , UC3 PEM  $n=12$ , HT1376 UnTx  $n=7$ , HT1376 PEM  $n=7$ . Data are presented as mean  $\pm$  SD. (c) Image of tumors harvested from UM-UC-3 and HT1376. In UM-UC-3 mouse model, 3 untreated and 3 treated were collected early due to tumor ulceration; therefore, were not included in the image. (d) MTA levels detected in xenograft tumor tissues. Data were analyzed with two-sided Student's t test. (e) Quantitation of 53BP1 staining in xenograft tumor tissues, which was represented as 53BP1 foci per nucleus via ImageJ. Data were analyzed with two-sided Student's t test. (f) Representative images for 53BP1 immunofluorescent staining on xenograft tumor tissue FFPE slides.

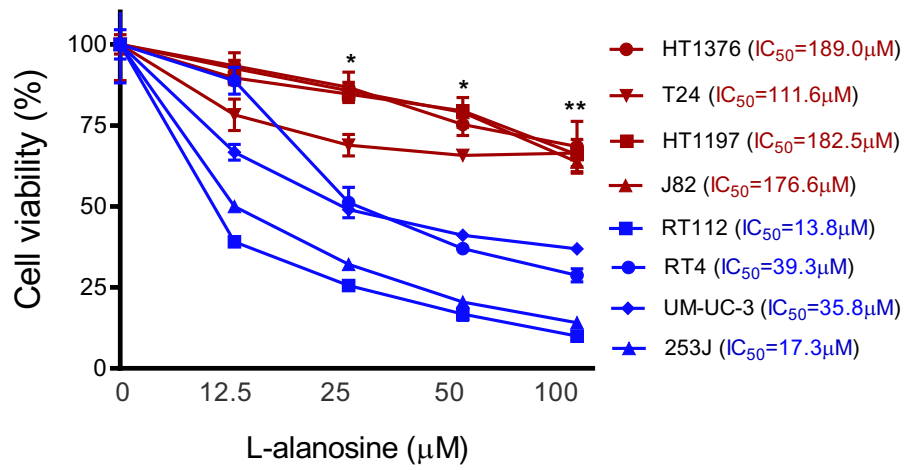

**Supplementary Fig. 8. L-alanosine effect on cell viability among UC cell lines. (a)** MTAP<sup>prof</sup> UC cell lines are resistant to *de novo* adenine synthesis inhibitor L-alanosine. MTAP<sup>def</sup> UC cell lines are sensitive to L-alanosine. Drug concentration that reduces viability by 50% (IC<sub>50</sub>) are displayed in the right upper corner. n=3 biologically independent samples for each cell line. Data are presented as mean +/- SD. Comparison was done using two-way ANOVA with Sidak's multiple comparisons test relative to solvent groups. \*, p<0.05 and \*\*, p<0.01.

**a**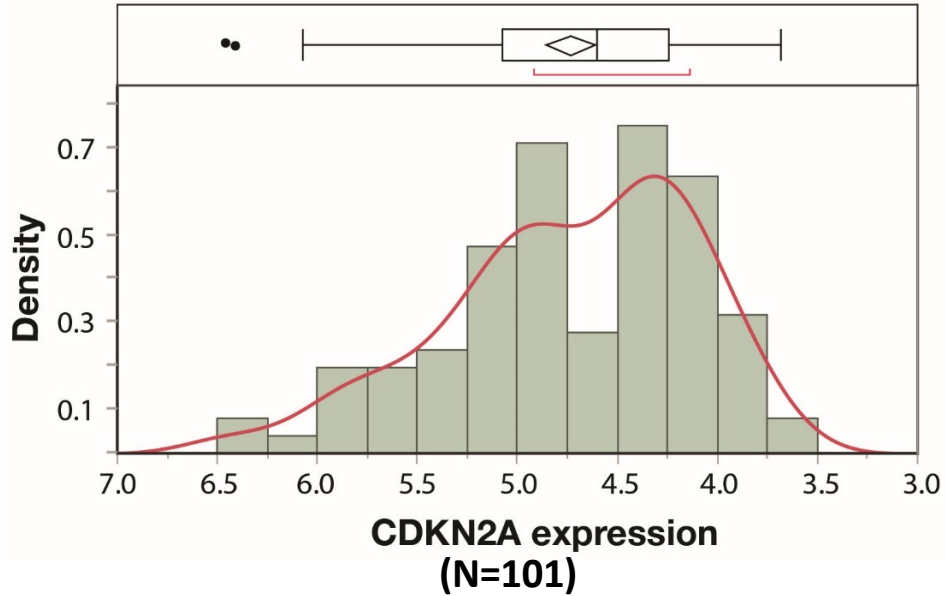**b**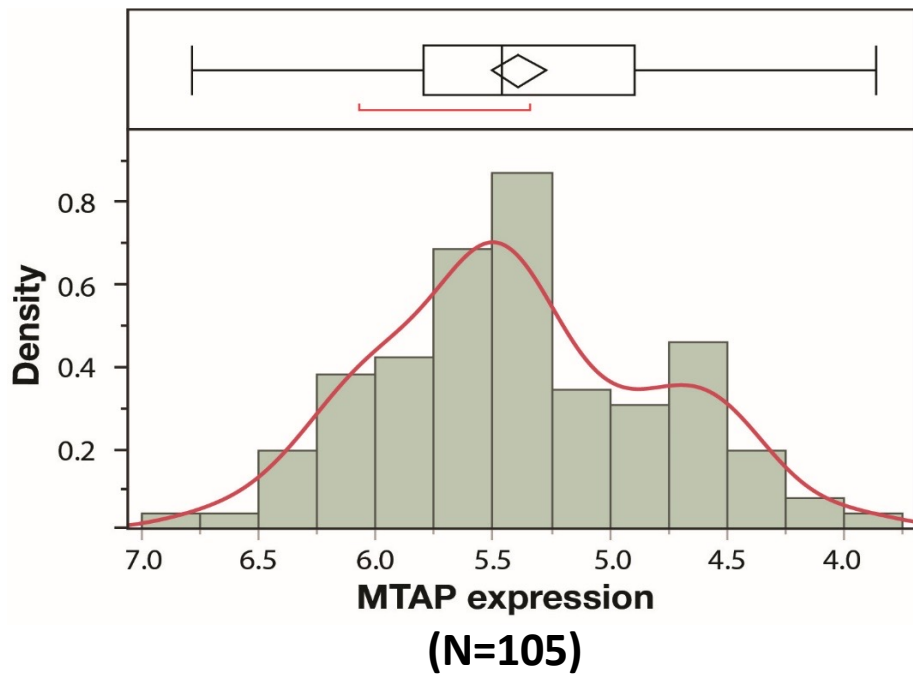

**Supplementary Fig. 9. Distribution of *CDKN2A* and *MTAP* RNA expression in RNA Affymetrix microarray in lung adenocarcinoma. (a) *CDKN2A* has bimodal distribution around the median value of 4.4 ( $n = 101$ ). (b) *MTAP* has bimodal distribution around the median value of 5.1 ( $n = 105$ ). IQR = the 3rd quartile minus the 1st quartile. Whiskers drawn to the furthest point within 1.5 x IQR from the box. Potential outliers (disconnected points). A red bracket defining the shortest half of the data (the densest region).**

### 1. FSC-SSC gating

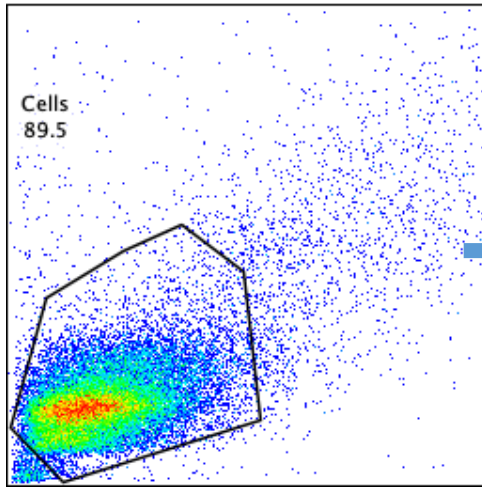

### 2. aggregate exclusion

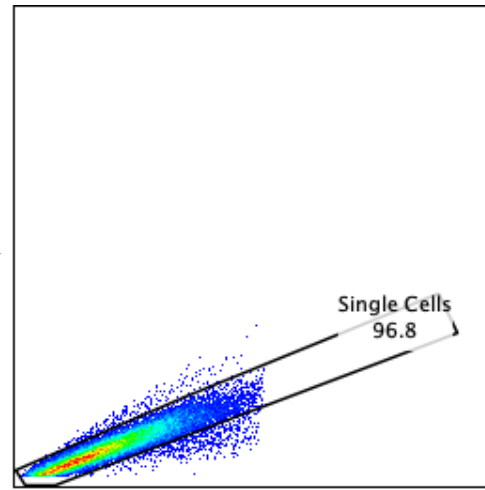

### 3. Cells in SubG1

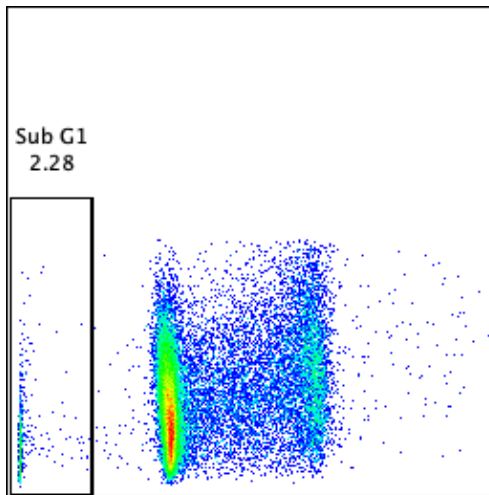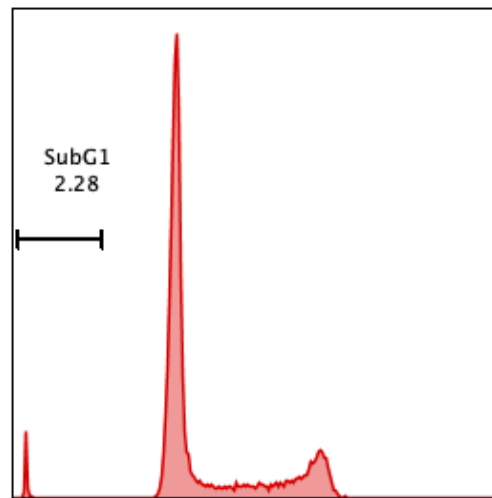

**Supplementary fig. 10. Gating strategy for SubG1.** Artifact exclusion included cell morphology (FSC-SSC) gating (1), aggregate exclusion (2), and propidium iodide (PI) gating for cells in SubG1 (3)

Supplementary Table 1. MTAP protein deficiency rate per bladder tumor tissue microarray IHC

| Tumor stage  | <b>MTAP<sup>def</sup></b> | <b>MTAP<sup>prof</sup></b> | <b>Sum</b> |
|--------------|---------------------------|----------------------------|------------|
| Tis-T1       | 12(24.5%)                 | 37(75.5%)                  | <b>49</b>  |
| T2-4a        | 15(24.6%)                 | 46(75.4%)                  | <b>61</b>  |
| LN+          | 4 (40%)                   | 6(60%)                     | <b>10</b>  |
| M+           | 11(35.5%)                 | 20 (64.5%)                 | <b>31</b>  |
| <b>Total</b> | <b>42(27.8%)</b>          | <b>109(72.2%)</b>          | <b>151</b> |

MTAP<sup>def</sup>: MTAP deficient, MTAP<sup>prof</sup>: MTAP proficient. Tis-T1: noninvasive, including Tis (in situ), Ta, and T1; T2-4a: invasive, including tumors invasive into muscularis propria, fat, prostate, and seminal vesicle; LN+: invasive to lymph nodes; M+: tumor metastasized to other organs. No difference was detected between T1 and other groups with two-tailed Fisher's exact test.



Supplementary Table 2: All Treatment Related Adverse Events

|                                                                | Total (N=7) |      |          |     |
|----------------------------------------------------------------|-------------|------|----------|-----|
|                                                                | All grades  |      | Grade ≥3 |     |
| All Treatment Related Adverse Event                            | N           | (%)  | N        | (%) |
| <b>Any Event</b>                                               | 7           | 100% | 3        | 43% |
| <b>Anemia</b>                                                  | 7           | 100% | 3        | 43% |
| <b>Anorexia</b>                                                | 1           | 14%  | 0        | 0%  |
| <b>Aspartate aminotransferase increased</b>                    | 1           | 14%  | 0        | 0%  |
| <b>Fatigue</b>                                                 | 3           | 43%  | 0        | 0%  |
| <b>Hallucinations</b>                                          | 1           | 14%  | 0        | 0%  |
| <b>Hypertension</b>                                            | 1           | 14%  | 0        | 0%  |
| <b>Lip infection</b>                                           | 1           | 14%  | 0        | 0%  |
| <b>Metabolism and nutrition disorders -<br/>Other, specify</b> | 1           | 14%  | 0        | 0%  |
| <b>Mucositis oral</b>                                          | 1           | 14%  | 0        | 0%  |
| <b>Nausea</b>                                                  | 3           | 43%  | 0        | 0%  |
| <b>Neutrophil count decreased</b>                              | 1           | 14%  | 0        | 0%  |
| <b>Rash maculo-papular</b>                                     | 1           | 14%  | 0        | 0%  |
| <b>Skin hyperpigmentation</b>                                  | 1           | 14%  | 0        | 0%  |
| <b>Skin infection</b>                                          | 1           | 14%  | 1        | 14% |
| <b>Somnolence</b>                                              | 1           | 14%  | 0        | 0%  |
| <b>Vomiting</b>                                                | 2           | 29%  | 1        | 14% |

Supplementary Table 3: All Adverse Events Regardless of Relation

|                                                     | Total (N=7) |      | Total (N=7) |     |
|-----------------------------------------------------|-------------|------|-------------|-----|
|                                                     | All grades  |      | All grades  |     |
| All Adverse Events                                  | N           | (%)  | N           | (%) |
| <b>Any Event</b>                                    | 7           | 100% | 6           | 86% |
| <b>Anemia</b>                                       | 7           | 100% | 3           | 43% |
| <b>Pain</b>                                         | 5           | 71%  | 2           | 29% |
| <b>Creatinine increased</b>                         | 6           | 86%  | 1           | 14% |
| <b>Fatigue</b>                                      | 6           | 86%  | 1           | 14% |
| <b>Hyperglycemia</b>                                | 3           | 43%  | 1           | 14% |
| <b>Hematuria</b>                                    | 2           | 29%  | 1           | 14% |
| <b>Platelet count decreased</b>                     | 2           | 29%  | 1           | 14% |
| <b>Vomiting</b>                                     | 2           | 29%  | 1           | 14% |
| <b>Blood bilirubin increased</b>                    | 1           | 14%  | 1           | 14% |
| <b>Hypotension</b>                                  | 1           | 14%  | 1           | 14% |
| <b>Renal and urinary disorders - Other, specify</b> | 1           | 14%  | 1           | 14% |
| <b>Sinus tachycardia</b>                            | 1           | 14%  | 1           | 14% |
| <b>Skin infection</b>                               | 1           | 14%  | 1           | 14% |
| <b>Thromboembolic event</b>                         | 1           | 14%  | 1           | 14% |
| <b>Vaginal hemorrhage</b>                           | 1           | 14%  | 1           | 14% |
| <b>Insomnia</b>                                     | 6           | 86%  | 0           | 0%  |
| <b>Back pain</b>                                    | 5           | 71%  | 0           | 0%  |
| <b>Constipation</b>                                 | 5           | 71%  | 0           | 0%  |
| <b>Nausea</b>                                       | 5           | 71%  | 0           | 0%  |
| <b>Allergic rhinitis</b>                            | 4           | 57%  | 0           | 0%  |
| <b>Anorexia</b>                                     | 4           | 57%  | 0           | 0%  |
| <b>Cough</b>                                        | 4           | 57%  | 0           | 0%  |
| <b>Gastroesophageal reflux disease</b>              | 4           | 57%  | 0           | 0%  |
| <b>Hypertension</b>                                 | 4           | 57%  | 0           | 0%  |
| <b>Hypothyroidism</b>                               | 4           | 57%  | 0           | 0%  |
| <b>Dyspnea</b>                                      | 3           | 43%  | 0           | 0%  |
| <b>Urinary urgency</b>                              | 3           | 43%  | 0           | 0%  |
| <b>Cholesterol high</b>                             | 2           | 29%  | 0           | 0%  |
| <b>Edema limbs</b>                                  | 2           | 29%  | 0           | 0%  |
| <b>Hypomagnesemia</b>                               | 2           | 29%  | 0           | 0%  |
| <b>Hyponatremia</b>                                 | 2           | 29%  | 0           | 0%  |
| <b>Paresthesia</b>                                  | 2           | 29%  | 0           | 0%  |
| <b>Alkaline phosphatase increased</b>               | 1           | 14%  | 0           | 0%  |

|                                                                         |   |     |   |    |
|-------------------------------------------------------------------------|---|-----|---|----|
| <b>Arthralgia</b>                                                       | 1 | 14% | 0 | 0% |
| <b>Arthritis</b>                                                        | 1 | 14% | 0 | 0% |
| <b>Aspartate aminotransferase increased</b>                             | 1 | 14% | 0 | 0% |
| <b>Bronchospasm</b>                                                     | 1 | 14% | 0 | 0% |
| <b>Depression</b>                                                       | 1 | 14% | 0 | 0% |
| <b>Diarrhea</b>                                                         | 1 | 14% | 0 | 0% |
| <b>Dizziness</b>                                                        | 1 | 14% | 0 | 0% |
| <b>Dry mouth</b>                                                        | 1 | 14% | 0 | 0% |
| <b>Dry skin</b>                                                         | 1 | 14% | 0 | 0% |
| <b>Fall</b>                                                             | 1 | 14% | 0 | 0% |
| <b>Fever</b>                                                            | 1 | 14% | 0 | 0% |
| <b>Flank pain</b>                                                       | 1 | 14% | 0 | 0% |
| <b>Glaucoma</b>                                                         | 1 | 14% | 0 | 0% |
| <b>Hallucinations</b>                                                   | 1 | 14% | 0 | 0% |
| <b>Headache</b>                                                         | 1 | 14% | 0 | 0% |
| <b>Hearing impaired</b>                                                 | 1 | 14% | 0 | 0% |
| <b>Hoarseness</b>                                                       | 1 | 14% | 0 | 0% |
| <b>Hypokalemia</b>                                                      | 1 | 14% | 0 | 0% |
| <b>Infections and infestations - Other, specify</b>                     | 1 | 14% | 0 | 0% |
| <b>Infusion site extravasation</b>                                      | 1 | 14% | 0 | 0% |
| <b>Investigations - Other, specify</b>                                  | 1 | 14% | 0 | 0% |
| <b>Lip infection</b>                                                    | 1 | 14% | 0 | 0% |
| <b>Localized edema</b>                                                  | 1 | 14% | 0 | 0% |
| <b>Lymphocyte count decreased</b>                                       | 1 | 14% | 0 | 0% |
| <b>Metabolism and nutrition disorders - Other, specify</b>              | 1 | 14% | 0 | 0% |
| <b>Mucositis oral</b>                                                   | 1 | 14% | 0 | 0% |
| <b>Musculoskeletal and connective tissue disorder - Other, specify</b>  | 1 | 14% | 0 | 0% |
| <b>Neutrophil count decreased</b>                                       | 1 | 14% | 0 | 0% |
| <b>Oral cavity fistula</b>                                              | 1 | 14% | 0 | 0% |
| <b>Peripheral sensory neuropathy</b>                                    | 1 | 14% | 0 | 0% |
| <b>Rash maculo-papular</b>                                              | 1 | 14% | 0 | 0% |
| <b>Rectal pain</b>                                                      | 1 | 14% | 0 | 0% |
| <b>Respiratory, thoracic and mediastinal disorders - Other, specify</b> | 1 | 14% | 0 | 0% |
| <b>Sinusitis</b>                                                        | 1 | 14% | 0 | 0% |
| <b>Skin hyperpigmentation</b>                                           | 1 | 14% | 0 | 0% |
| <b>Somnolence</b>                                                       | 1 | 14% | 0 | 0% |
| <b>Sore throat</b>                                                      | 1 | 14% | 0 | 0% |

|                                   |          |            |          |           |
|-----------------------------------|----------|------------|----------|-----------|
| <b>Urinary frequency</b>          | <b>1</b> | <b>14%</b> | <b>0</b> | <b>0%</b> |
| <b>Vaginal infection</b>          | <b>1</b> | <b>14%</b> | <b>0</b> | <b>0%</b> |
| <b>Weight loss</b>                | <b>1</b> | <b>14%</b> | <b>0</b> | <b>0%</b> |
| <b>White blood cell decreased</b> | <b>1</b> | <b>14%</b> | <b>0</b> | <b>0%</b> |

Supplementary Table 4: Response of patients with lung adenocarcinoma to pemetrexed-containing chemotherapy based on CDKN2A/MTAP status by mRNA

|                                                 | PD        | SD ≥6 mos | SD <6 mos | PR        | CR       | ORR (N)         | CB (N)          |
|-------------------------------------------------|-----------|-----------|-----------|-----------|----------|-----------------|-----------------|
| CDKN2A <sup>hi</sup> /MTAP <sup>hi</sup> (n=25) | 7         | 4         | 7         | 7         | 0        | 28% (7)         | 44% (11)        |
| CDKN2A <sup>hi</sup> /MTAP <sup>lo</sup> (n=13) | 3         | 4         | 2         | 4         | 0        | 31% (4)         | 61% (8)         |
| CDKN2A <sup>lo</sup> /MTAP <sup>hi</sup> (n=8)  | 3         | 5         | 0         | 0         | 0        | 0% (0)          | 62% (5)         |
| CDKN2A <sup>lo</sup> /MTAP <sup>lo</sup> (n=26) | 5         | 1         | 6         | 13        | 1        | 54% (14)        | 58% (15)        |
| <b>Total (n=72)</b>                             | <b>18</b> | <b>14</b> | <b>15</b> | <b>24</b> | <b>1</b> | <b>35% (25)</b> | <b>54% (39)</b> |

PD: progressive disease, SD: stable disease, mos: months, PR: partial response, CR: complete response, ORR: overall response rate, CB: clinical benefit. ORR was defined as PR + CR. CB was defined as SD ≥6 mos + CR + PR.

Supplementary Table 5: generalized linear model (GLM) estimating the odds ratio and p-value for most frequently altered genes in the lung cancer cohort (n=72). We estimate the correlation of 10 most altered genes in lung cancer beside MTAP to estimate the odds ratio and p-value for each gene independently. Genes with an odds ratio >1 (log (odds ratio) >0) and a p-value <0.05 are considered to be positively correlated with response. Genes with an odds ratio <1 (log (odds ratio) <0) and a p-value <0.05 are considered to be negatively correlated with response. Adjustments were made for multiple gene comparisons and false discovery rate and presented as q values.

| geneName      | OddsRatio   | coeff        | ciLow       | ciHigh      | p_value     | q_value     |
|---------------|-------------|--------------|-------------|-------------|-------------|-------------|
| <i>MTAP</i>   | 0.392732231 | -0.934627244 | 0.163167375 | 0.875693009 | 0.027502371 | 0.302526078 |
| <i>PIK3CA</i> | 0.396821832 | -0.924267886 | 0.142228169 | 0.991731621 | 0.05927728  | 0.326025038 |
| <i>CDKN2A</i> | 0.630573777 | -0.461125117 | 0.267128178 | 1.395751323 | 0.26886466  | 0.475911601 |
| <i>TP53</i>   | 0.948629464 | -0.052737006 | 0.456917359 | 1.979880005 | 0.886436851 | 0.886436851 |
| <i>ROS1</i>   | 1.143344857 | 0.133958052  | 0.885756175 | 1.481448888 | 0.302852837 | 0.475911601 |
| <i>RET</i>    | 1.148192416 | 0.138188894  | 0.26788913  | 4.591067475 | 0.845135547 | 0.886436851 |
| <i>MET</i>    | 1.226373229 | 0.20406122   | 0.921204317 | 1.661766255 | 0.169596079 | 0.373111374 |
| <i>KRAS</i>   | 1.263453703 | 0.233849005  | 0.500967174 | 3.241732772 | 0.619256902 | 0.85147824  |
| <i>ALK</i>    | 1.402106297 | 0.337975604  | 0.068735069 | 30.3297377  | 0.825786859 | 0.886436851 |
| <i>EGFR</i>   | 1.620237041 | 0.48257246   | 0.858411649 | 3.231309557 | 0.148775108 | 0.373111374 |
| <i>BRAF</i>   | 2.317219518 | 0.840367983  | 0.725596731 | 8.220870683 | 0.167996811 | 0.373111374 |
